# Supplementary material for: Detection of DNA of filariae closely related to Mansonella perstans in faecal samples from wild non-human primates from Cameroon and Gabon
Source: PubMed Central journal article supplement (PMC7298833; doi:10.1186/s13071-020-04184-1), 2020-06-16
Supplement: 13071_2020_4184_MOESM1_ESM.pdf [file 13071_2020_4184_MOESM1_ESM.pdf]

**Additional file 1: Table S1**

| <b>Host species</b>    | <b>Sequence ID</b> | <b>#Accession<br/>(<i>cox1</i>)</b> |
|------------------------|--------------------|-------------------------------------|
| <i>H.sapiens</i>       | <i>Cam11248</i>    | MN890048                            |
| <i>H.sapiens</i>       | <i>Cam12783</i>    | MN890049                            |
| <i>H.sapiens</i>       | <i>Cam12803</i>    | MN890050                            |
| <i>H.sapiens</i>       | <i>Cam14520</i>    | MN890051                            |
| <i>H.sapiens</i>       | <i>Cam2624</i>     | MN890052                            |
| <i>H.sapiens</i>       | <i>Cam8136</i>     | MN890053                            |
| <i>H.sapiens</i>       | <i>Cam9492</i>     | MN890054                            |
| <i>C.agilis</i>        | <i>Cam5149</i>     | MN890055                            |
| <i>P.t.troglodytes</i> | <i>Cam5152</i>     | MN890056                            |
| <i>P.t.troglodytes</i> | <i>Cam5157</i>     | MN890057                            |
| <i>P.t.troglodytes</i> | <i>Cam5158</i>     | MN890058                            |
| <i>P.t.troglodytes</i> | <i>Cam5159</i>     | MN890059                            |
| <i>P.t.troglodytes</i> | <i>Cam5160</i>     | MN890060                            |
| <i>P.t.troglodytes</i> | <i>Cam5163</i>     | MN890061                            |
| <i>P.t.troglodytes</i> | <i>Cam6945</i>     | MN890062                            |
| <i>P.t.troglodytes</i> | <i>Cam6948</i>     | MN890063                            |
| <i>P.t.troglodytes</i> | <i>Cam6952</i>     | MN890064                            |
| <i>P.t.troglodytes</i> | <i>Cam6955</i>     | MN890065                            |
| <i>P.t.troglodytes</i> | <i>Cam6958</i>     | MN890066                            |
| <i>P.t.troglodytes</i> | <i>Cam6959</i>     | MN890067                            |
| <i>P.t.troglodytes</i> | <i>Cam772</i>      | MN890068                            |
| <i>P.t.troglodytes</i> | <i>Cam773</i>      | MN890069                            |
| <i>P.t.troglodytes</i> | <i>Gab1000</i>     | MN890070                            |
| <i>P.t.troglodytes</i> | <i>Gab1002</i>     | MN890071                            |
| <i>P.t.troglodytes</i> | <i>Gab1015</i>     | MN890072                            |
| <i>P.t.troglodytes</i> | <i>Gab1022</i>     | MN890073                            |
| <i>P.t.troglodytes</i> | <i>Gab1031</i>     | MN890074                            |
| <i>P.t.troglodytes</i> | <i>Gab1184</i>     | MN890075                            |
| <i>P.t.troglodytes</i> | <i>Gab1188</i>     | MN890076                            |
| <i>P.t.troglodytes</i> | <i>Gab1003</i>     | MN890077                            |
| <i>P.t.troglodytes</i> | <i>Gab917</i>      | MN890078                            |
| <i>G.g.gorilla</i>     | <i>Cam9842</i>     | MN890079                            |
| <i>G.g.gorilla</i>     | <i>Cam9840</i>     | MN890080                            |
| <i>G.g.gorilla</i>     | <i>Cam9839</i>     | MN890081                            |
| <i>G.g.gorilla</i>     | <i>Cam9838</i>     | MN890082                            |
| <i>G.g.gorilla</i>     | <i>Cam9837</i>     | MN890083                            |
| <i>G.g.gorilla</i>     | <i>Cam9835</i>     | MN890084                            |
| <i>G.g.gorilla</i>     | <i>Cam9833</i>     | MN890085                            |
| <i>G.g.gorilla</i>     | <i>Cam9832</i>     | MN890086                            |
| <i>G.g.gorilla</i>     | <i>Cam9829</i>     | MN890087                            |
| <i>G.g.gorilla</i>     | <i>Cam9825</i>     | MN890088                            |
| <i>G.g.gorilla</i>     | <i>Cam9822</i>     | MN890089                            |
| <i>G.g.gorilla</i>     | <i>Cam9820</i>     | MN890090                            |
| <i>G.g.gorilla</i>     | <i>Cam9819</i>     | MN890091                            |
| <i>G.g.gorilla</i>     | <i>Cam9803</i>     | MN890092                            |
| <i>C.nictitans</i>     | <i>Cam4880</i>     | MN890093                            |

|                                |                                      |          |
|--------------------------------|--------------------------------------|----------|
| <i>C. nictitans</i>            | <i>Cam4879</i>                       | MN890094 |
| <i>P.t.troglodytes</i>         | <i>Cam4874</i>                       | MN890095 |
| <i>P.t.troglodytes</i>         | <i>Cam991</i>                        | MN890096 |
| <i>P.t.troglodytes</i>         | <i>Cam989</i>                        | MN890097 |
| <i>P.t.troglodytes</i>         | <i>Cam987</i>                        | MN890098 |
| <i>P.t.troglodytes</i>         | <i>Cam963</i>                        | MN890099 |
| <i>P.t.troglodytes</i>         | <i>Cam962</i>                        | MN890100 |
| <i>P.t.troglodytes</i>         | <i>Cam957</i>                        | MN890101 |
| <i>P.t.troglodytes</i>         | <i>Gab1228</i>                       | MN890102 |
| <i>P.t.troglodytes</i>         | <i>Gab1253</i>                       | MN890103 |
| <i>P.t.troglodytes</i>         | <i>Gab1275</i>                       | MN890104 |
| <i>P.t.troglodytes</i>         | <i>Gab1277</i>                       | MN890105 |
| <i>P.t.troglodytes</i>         | <i>Gab1301</i>                       | MN890106 |
| <i>P.t.troglodytes</i>         | <i>Gab2318</i>                       | MN890107 |
| <i>P.t.troglodytes</i>         | <i>Gab2351</i>                       | MN890108 |
| <i>P.t.troglodytes</i>         | <i>Gab2352</i>                       | MN890109 |
| <i>P.t.troglodytes</i>         | <i>Gab913</i>                        | MN890110 |
| <i>P.t.troglodytes</i>         | <i>Gab948</i>                        | MN890111 |
| <i>P.t.troglodytes</i>         | <i>Gab949</i>                        | MN890112 |
| <i>P.t.troglodytes</i>         | <i>Gab998</i>                        | MN890113 |
| <i>C. nictitans</i>            | <i>Cam6960</i>                       | MN890114 |
| <i>G.g.gorilla</i>             | <i>Cam5324</i>                       | MN890115 |
| <i>G.g.gorilla</i>             | <i>Cam5337</i>                       | MN890116 |
| <i>G.g.gorilla</i>             | <i>Cam5338</i>                       | MN890117 |
| <i>G.g.gorilla</i>             | <i>Cam5354</i>                       | MN890118 |
| <i>G.g.gorilla</i>             | <i>Cam5360</i>                       | MN890119 |
| <i>G.g.gorilla</i>             | <i>Cam5369</i>                       | MN890120 |
| <i>G.g.gorilla</i>             | <i>Cam9965</i>                       | MN890121 |
| <i>G.g.gorilla</i>             | <i>Cam10016</i>                      | MN890122 |
| <i>G.g.gorilla</i>             | <i>Cam10015</i>                      | MN890123 |
| <i>G.g.gorilla</i>             | <i>Cam10014</i>                      | MN890124 |
| <i>H.sapiens</i>               | <i>Mansonella perstans</i>           | KU215907 |
| <i>H.sapiens</i>               | <i>Mansonella perstans</i>           | LT623909 |
| <i>H.sapiens</i>               | <i>Mansonella ozzardi</i>            | KP760195 |
| <i>Not specified</i>           | <i>Mansonella dunni</i>              | KY434309 |
| <i>Not specified</i>           | <i>Loa loa</i>                       | AJ544875 |
| <i>Canis lupus familiaris</i>  | <i>Dirofilaria repens</i>            | KY828979 |
| <i>H.sapiens</i>               | <i>Onchocerca volvulus</i>           | MH190075 |
| <i>Gorilla sp.</i>             | <i>Protospirura muricola</i>         | KP760207 |
| <i>Panthera leo</i>            | <i>Filaria lalata</i>                | KP760186 |
| <i>Agama agam</i>              | <i>Foleyella candezei</i>            | KP760187 |
| <i>Ateles sp.</i>              | <i>Dipetalonema caudispina</i>       | KP760178 |
| <i>Bos taurus</i>              | <i>Onchocerca armillata</i>          | KP760200 |
| <i>B. taurus</i>               | <i>Onchocerca gutturosa</i>          | KP760201 |
| <i>B. taurus</i>               | <i>Onchocerca ochengi</i>            | KP760202 |
| <i>Canis familiaris</i>        | <i>Cercopithifilaria bainae</i>      | KP760175 |
| <i>Capreolus capreolus</i>     | <i>Cercopithifilaria rugosicauda</i> | KC610815 |
| <i>Cariollia perspicillata</i> | <i>Litomosoides brasiliensis</i>     | KP760190 |
| <i>Cebus olivaceus</i>         | <i>Dipetalonema gracile</i>          | KP760179 |
| <i>Cervus nippon</i>           | <i>Mansonella perforata</i>          | AM749265 |

|                                  |                                     |          |
|----------------------------------|-------------------------------------|----------|
| <i>C. nippon</i>                 | <i>Onchocerca eberhardi</i>         | AM749268 |
| <i>C. nippon</i>                 | <i>Onchocerca skrjabini</i>         | AM749269 |
| <i>Glossophaga soricina</i>      | <i>Litomosoides hamletti</i>        | KP760192 |
| <i>H.sapiens</i>                 | <i>Brugia timori</i>                | KP760171 |
| <i>H.sapiens</i>                 | <i>Loa loa</i>                      | KP760194 |
| <i>Hydrochoerus hydrochaeris</i> | <i>Cruorifilaria tubero cauda</i>   | KP760176 |
| <i>H. hydrochaeris</i>           | <i>Yatesia hydrochoerus</i>         | KP760210 |
| <i>Lagothrix peoppigi</i>        | <i>Dipetalonema robini</i>          | KP760183 |
| <i>Meriones unguiculatus</i>     | <i>Brugia malayi</i>                | KP760171 |
| <i>M. unguiculatus</i>           | <i>Brugia pahangi</i>               | KP760171 |
| <i>M. unguiculatus</i>           | <i>Litomosoides sigmodontis</i>     | mLs2.0   |
| <i>Naemorhedus crispus</i>       | <i>Loxodontofilaria caprini</i>     | AM749237 |
| <i>Not specified</i>             | <i>Onchocerca volvulus</i>          | AF015193 |
| <i>Oriolus oriolus</i>           | <i>Cardiofilaria pavlovskyi</i>     | KP760174 |
| <i>Pachycactylus turneri</i>     | <i>Madathamugadia hiepei</i>        | JQ888270 |
| <i>Phyllomedusa bicolor</i>      | <i>Ochoterenella sp.3</i>           | KP760197 |
| <i>Podiceps nigricollis</i>      | <i>Pelecitus fulicaeatrae</i>       | KP760206 |
| <i>Rangifer tarandus</i>         | <i>Rumenfilaria andersoni</i>       | JQ888273 |
| <i>Rattus tanezumi</i>           | <i>Breinlia jittapalapongi</i>      | KP760170 |
| <i>Rhinella granulosa</i>        | <i>Ochoterenella sp.1</i>           | KP760198 |
| <i>R. marina</i>                 | <i>Ochoterenella sp.2</i>           | KP760199 |
| <i>Saltator similis</i>          | <i>Aproctella alessandroi</i>       | FR823335 |
| <i>Samiris scuireus</i>          | <i>Dipetalonema graciliformis</i>   | KP760182 |
| <i>Sus scrofa</i>                | <i>Onchocerca dewittei japonica</i> | KP760203 |
| <i>Trachops cirrhosus</i>        | <i>Litomosoides solarii</i>         | KP760193 |

---

| Host species             | Sequence ID                | #Accession<br>I2S rDNA |
|--------------------------|----------------------------|------------------------|
| <i>C.torquatus</i>       | Cam3338                    | MN927137               |
| <i>P.t.troglodytes</i>   | Gab947                     | MN927138               |
| <i>P.t.troglodytes</i>   | Gab904                     | MN927139               |
| <i>P.t.troglodytes</i>   | Gab957                     | MN927140               |
| <i>G.g.gorilla</i>       | Cam9847                    | MN927141               |
| <i>G.g.gorilla</i>       | Cam9846                    | MN927142               |
| <i>G.g.gorilla</i>       | Cam9838                    | MN927143               |
| <i>G.g.gorilla</i>       | Cam9837                    | MN927144               |
| <i>G.g.gorilla</i>       | Cam9833                    | MN927145               |
| <i>G.g.gorilla</i>       | Cam9821                    | MN927146               |
| <i>G.g.gorilla</i>       | Cam9819                    | MN927147               |
| <i>G.g.gorilla</i>       | Cam9805                    | MN927148               |
| <i>G.g.gorilla</i>       | Cam9803                    | MN927149               |
| <i>G.g.gorilla</i>       | Cam9802                    | MN927150               |
| <i>G.g.gorilla</i>       | Cam9801                    | MN927151               |
| <i>P.t.troglodytes</i>   | Cam4875                    | MN927152               |
| <i>P.t.troglodytes</i>   | Cam4874                    | MN927153               |
| <i>P.t.troglodytes</i>   | Cam990                     | MN927154               |
| <i>Mandrillus sphinx</i> | Cam3337                    | MN927155               |
| <i>P.t.troglodytes</i>   | Cam775                     | MN927156               |
| <i>P.t.troglodytes</i>   | Gab1294                    | MN927157               |
| <i>P.t.troglodytes</i>   | Cam10017                   | MN927158               |
| <i>G.g.gorilla</i>       | Cam2470                    | MN927159               |
| <i>P.t.troglodytes</i>   | Gab2318                    | MN927160               |
| <i>P.t.troglodytes</i>   | Gab998                     | MN927161               |
| <i>P.t.troglodytes</i>   | Cam777                     | MN927162               |
| <i>P.t.troglodytes</i>   | Cam776                     | MN927163               |
| <i>P.t.troglodytes</i>   | Cam5154                    | MN927164               |
| <i>P.t.troglodytes</i>   | Cam5153                    | MN927165               |
| <i>P.t.troglodytes</i>   | Cam5160                    | MN927166               |
| <i>C. agilis</i>         | Cam5149                    | MN927167               |
| <i>P.t.troglodytes</i>   | Cam5148                    | MN927168               |
| <i>P.t.troglodytes</i>   | Cam5145                    | MN927169               |
| <i>P.t.troglodytes</i>   | Gab1291                    | MN927170               |
| <i>P.t.troglodytes</i>   | Gab1275                    | MN927171               |
| <i>P.t.troglodytes</i>   | Gab1248                    | MN927172               |
| <i>P.t.troglodytes</i>   | Cam5139                    | MN927173               |
| <i>P.t.troglodytes</i>   | Cam5158                    | MN927174               |
| <i>H.sapiens</i>         | Cam8136                    | MN927175               |
| <i>H.sapiens</i>         | Cam9492                    | MN927176               |
| <i>H.sapiens</i>         | Cam11248                   | MN927177               |
| <i>H.sapiens</i>         | Cam12803                   | MN927178               |
| <i>H.sapiens</i>         | Cam14520                   | MN927179               |
| <i>H.sapiens</i>         | Cam2604                    | MN927180               |
| Not specified            | <i>Mansonella perstans</i> | LT623913               |

|                       |                                      |          |
|-----------------------|--------------------------------------|----------|
| <i>C. olivaceus</i>   | <i>Mansonella_atalensis_amazonae</i> | AM779823 |
| <i>Not specified</i>  | <i>Mansonella_dunni</i>              | KY434310 |
| <i>H.sapiens</i>      | <i>Mansonella_ozzardi</i>            | JF412324 |
| <i>Cervus nippon</i>  | <i>Mansonella_perforata</i>          | AM779802 |
| <i>Not specified</i>  | <i>Brugia_malayi</i>                 | AJ544843 |
| <i>Cervus elaphus</i> | <i>Onchocerca_flexuosa</i>           | LT732683 |
| <i>Lutra lutra</i>    | <i>Dirofilaria_immitis</i>           | MH051846 |
| <i>Panthera leo</i>   | <i>Filaria_lalata</i>                | KP760332 |

---
