# Supplementary material for: Detection of DNA of filariae closely related to Mansonella perstans in faecal samples from wild non-human primates from Cameroon and Gabon
Source: PubMed Central journal article supplement (PMC7298833; doi:10.1186/s13071-020-04184-1), 2020-06-16

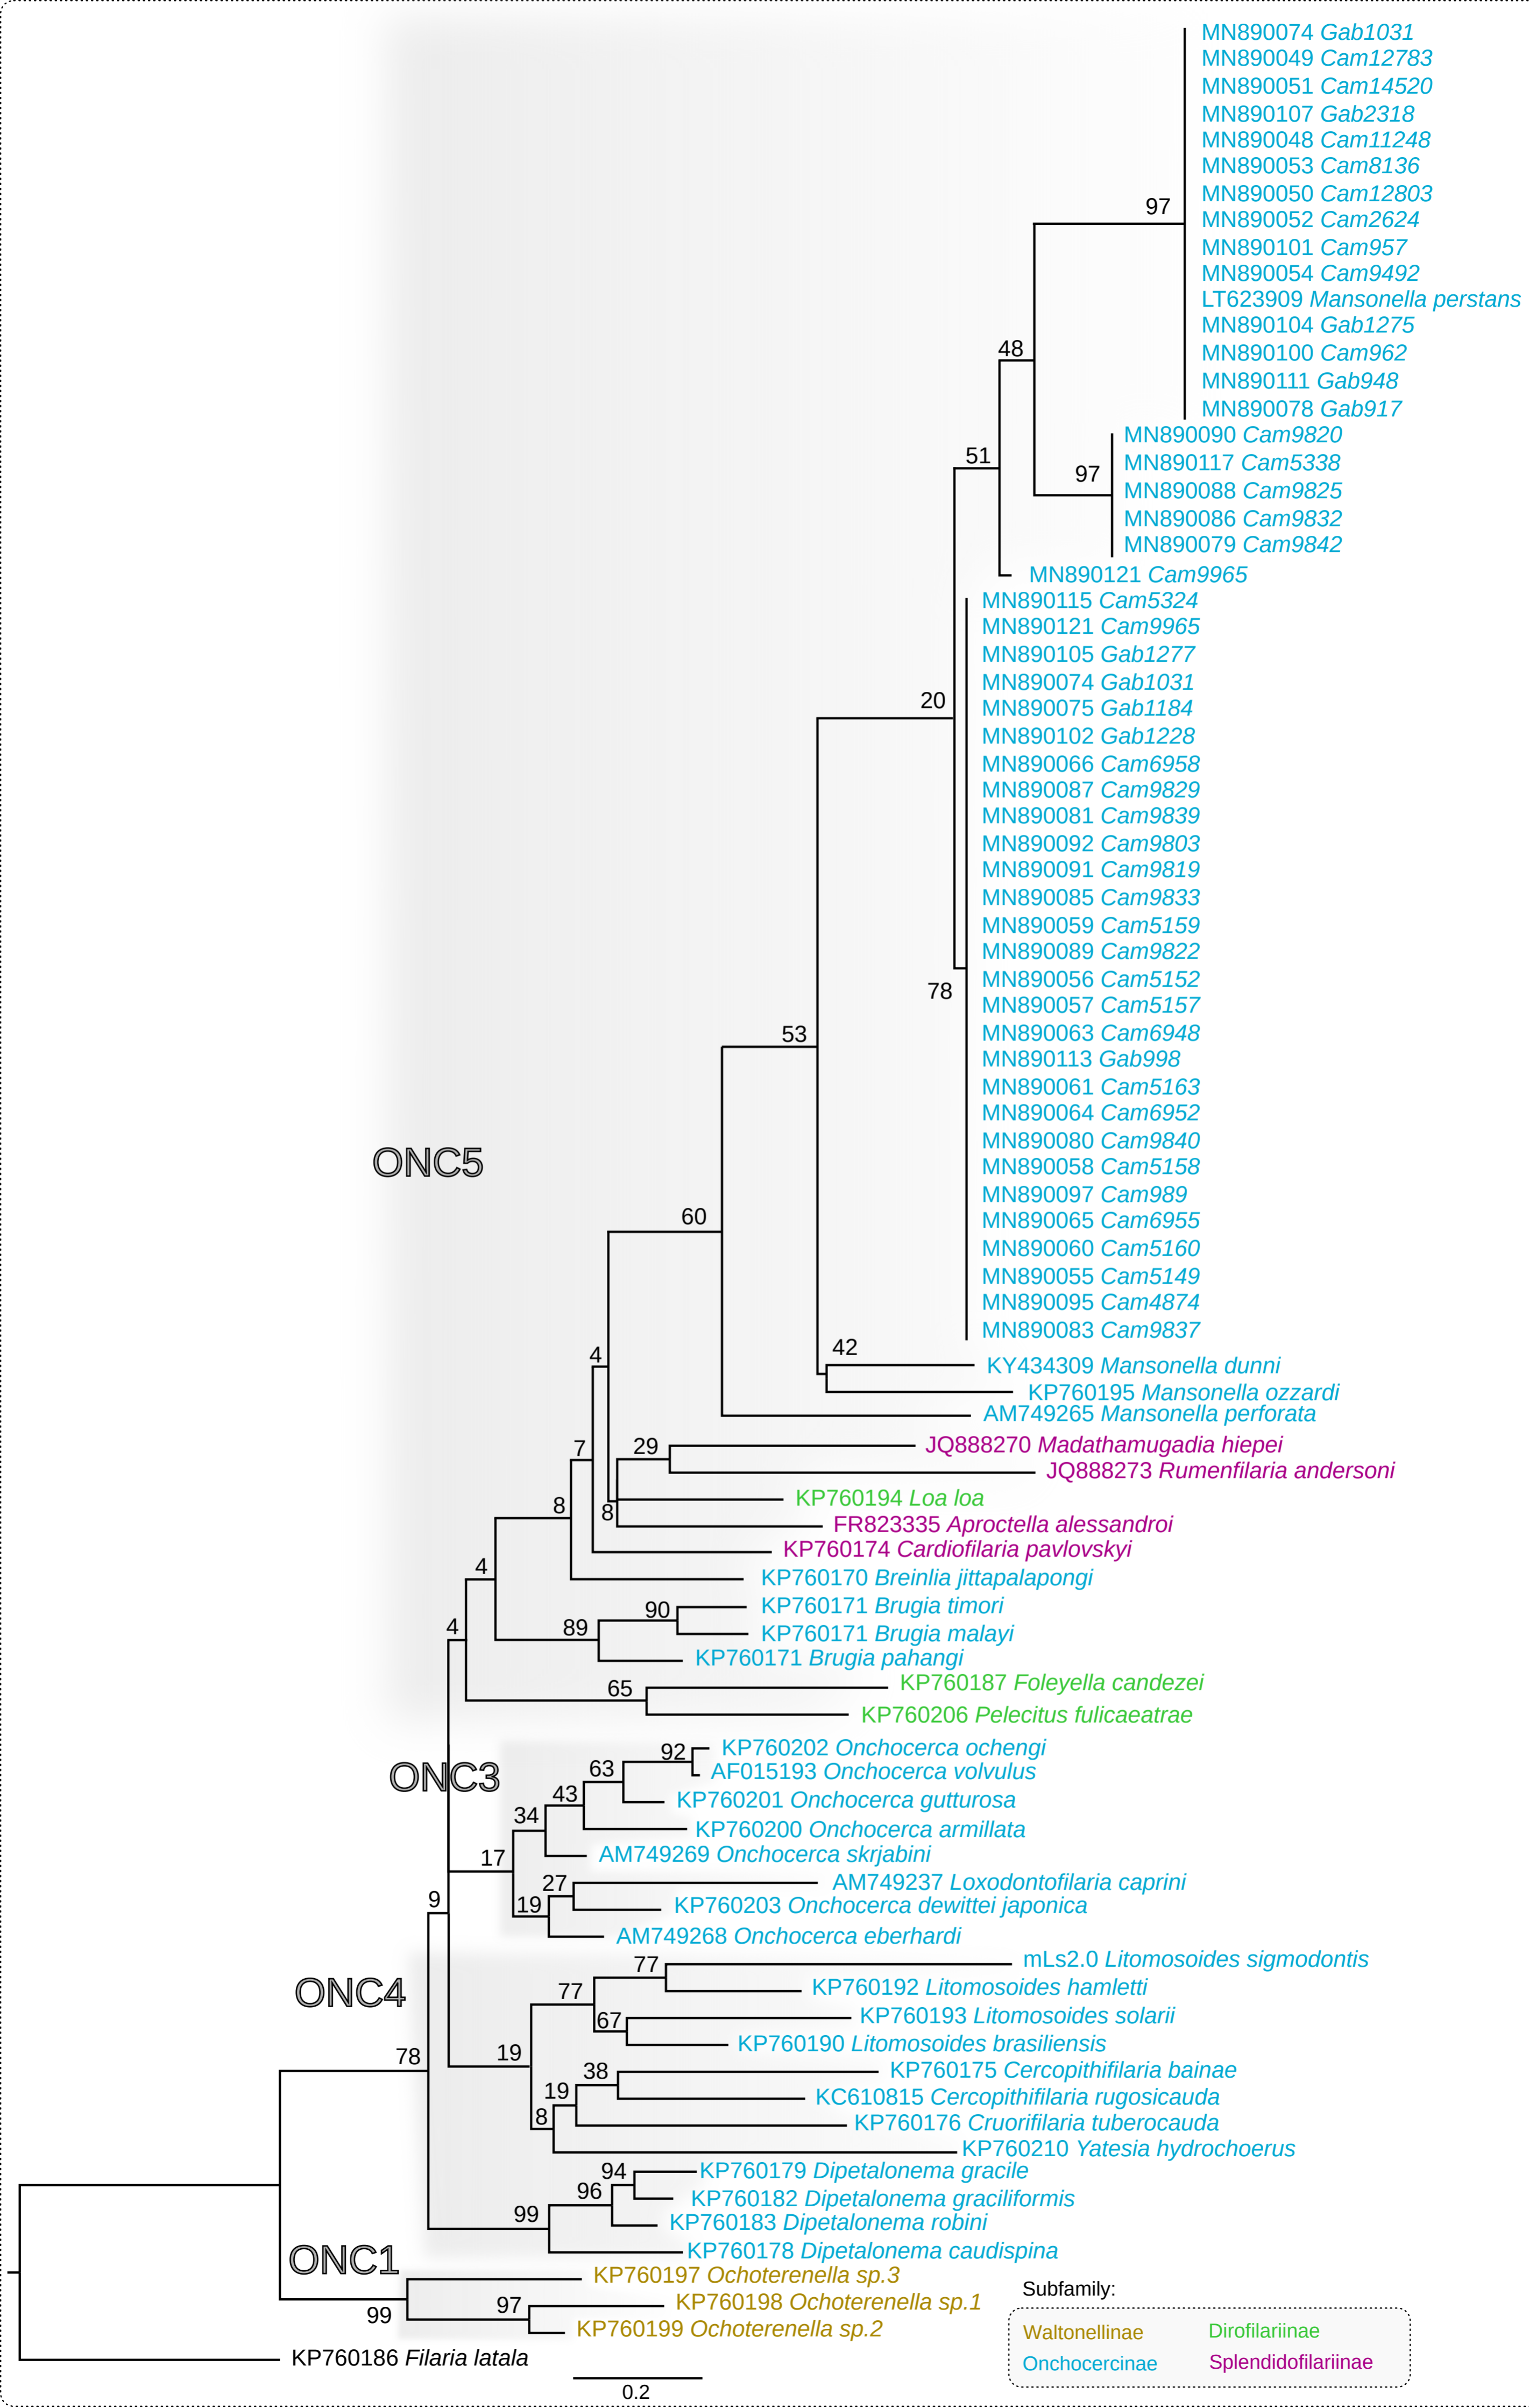

Supplement: 13071_2020_4184_MOESM2_ESM.pdf [file 13071_2020_4184_MOESM2_ESM.pdf]
